# Supplementary material
Source: bioRxiv or medRxiv preprint supplement (https://www.biorxiv.org/highwire/filestream/69267/field_highwire_adjunct_files/0/220723-1.pdf)

Dorsal  
Ant. + Post.  
Ventral

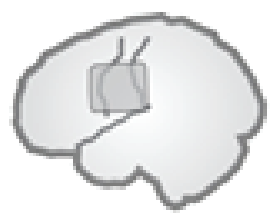

IFG: Inferior Frontal Gyrus pars opercularis  
PMv: Ventral Premotor Cortex  
M1v: Ventral Motor Cortex

Subject 1

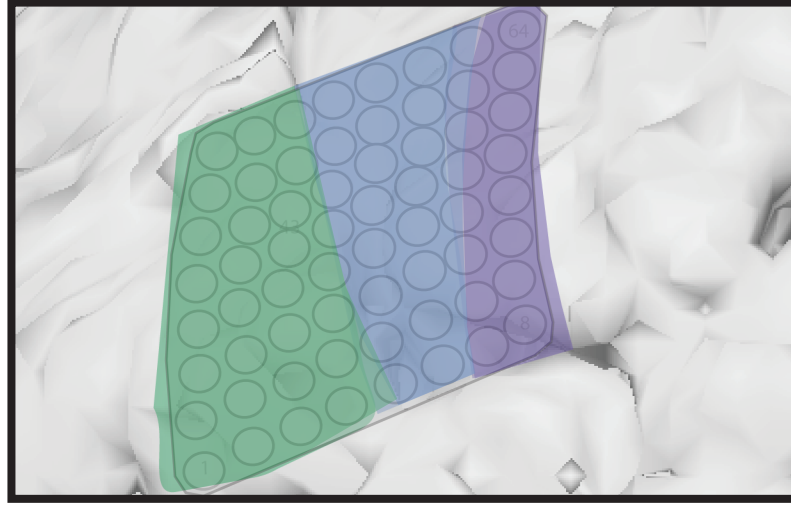

Subject 4

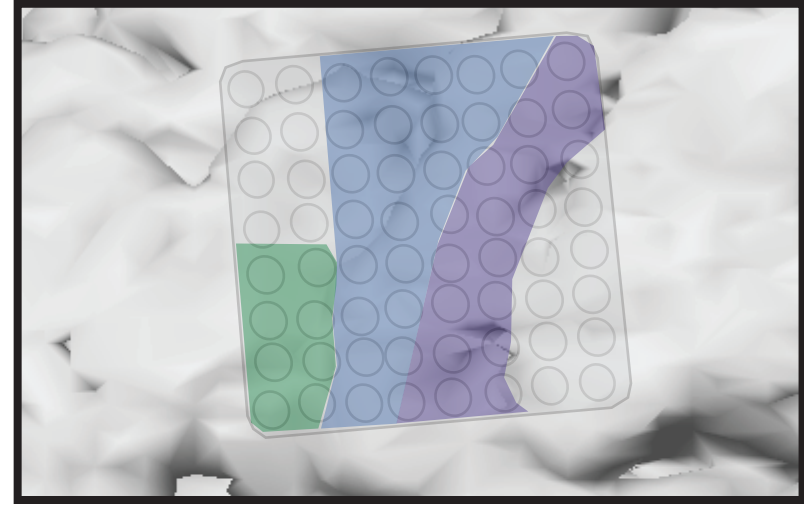

Subject 7

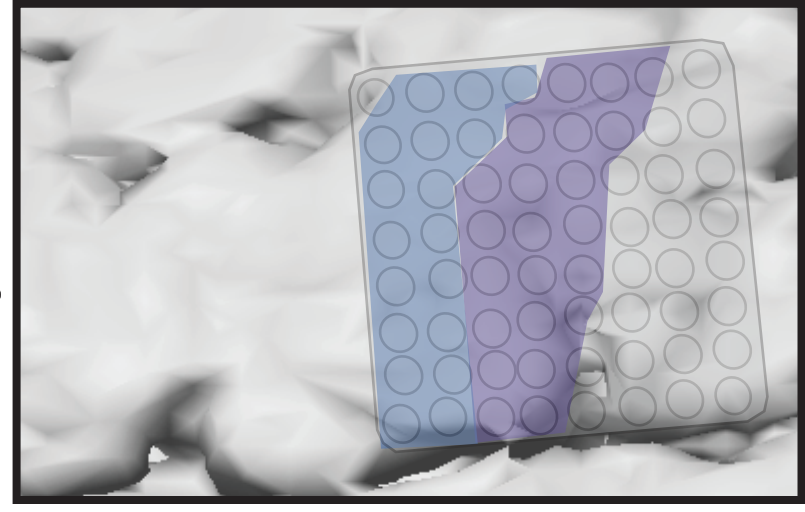

Subject 2

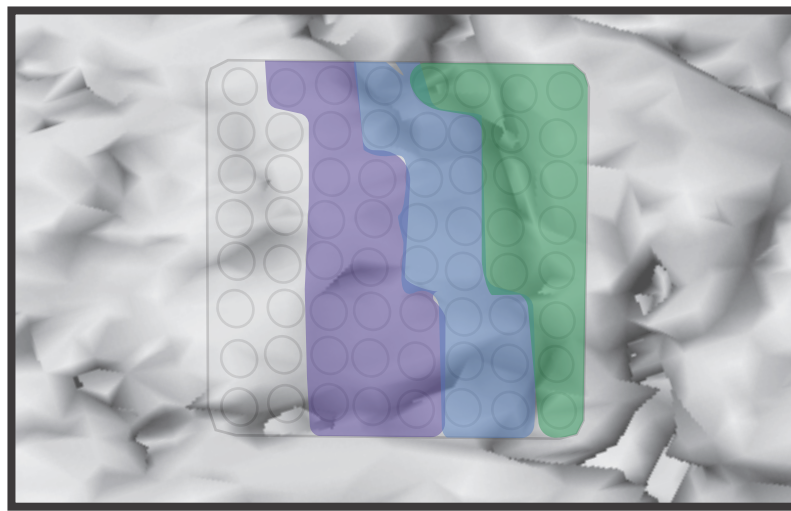

Subject 5

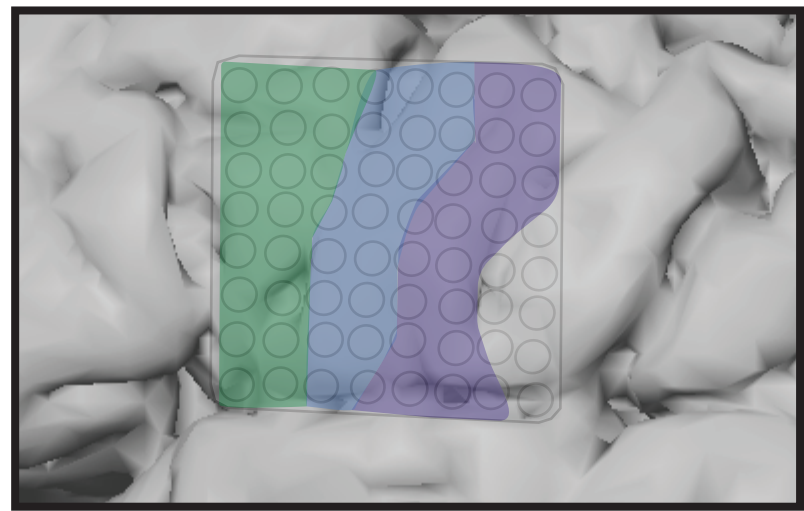

Subject 8

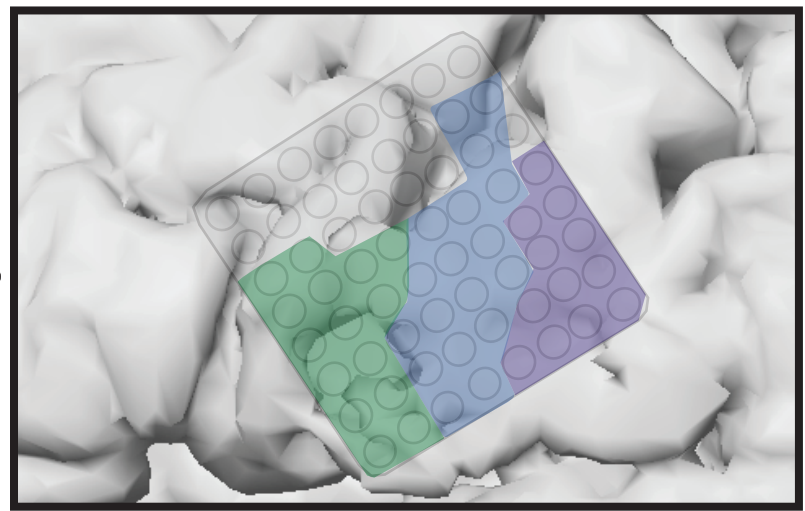

Subject 3

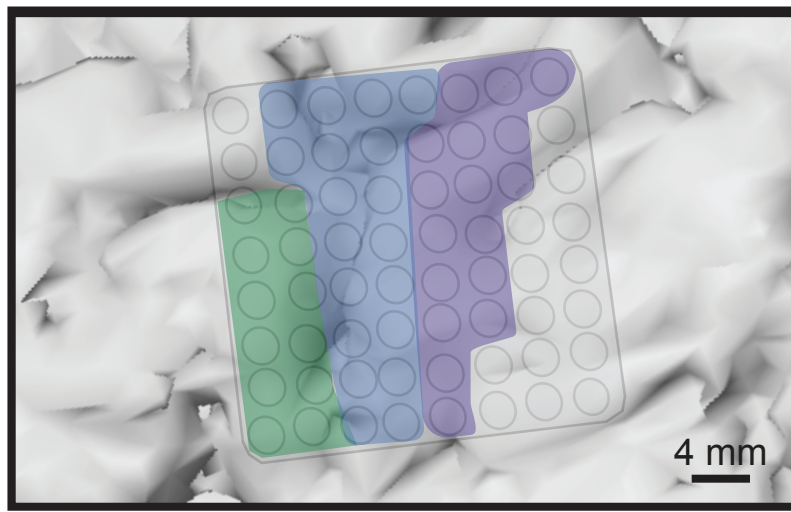

Subject 6

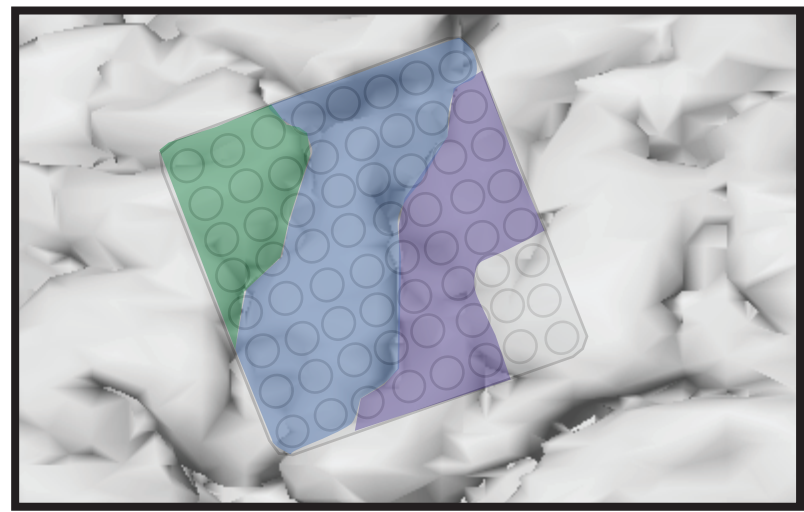

Subject 9

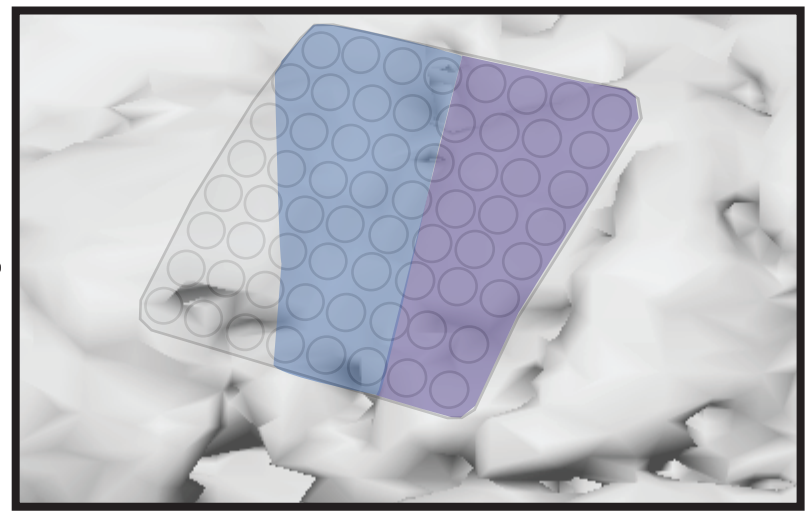

**A**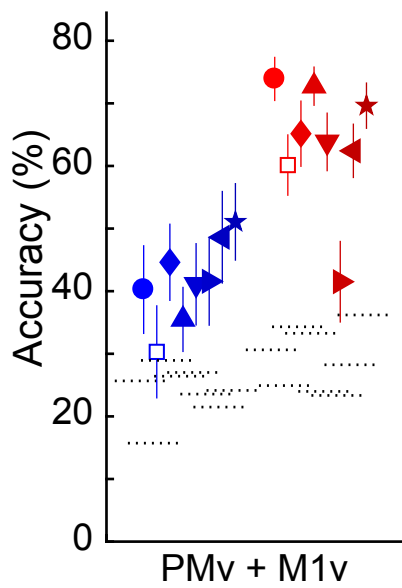**B**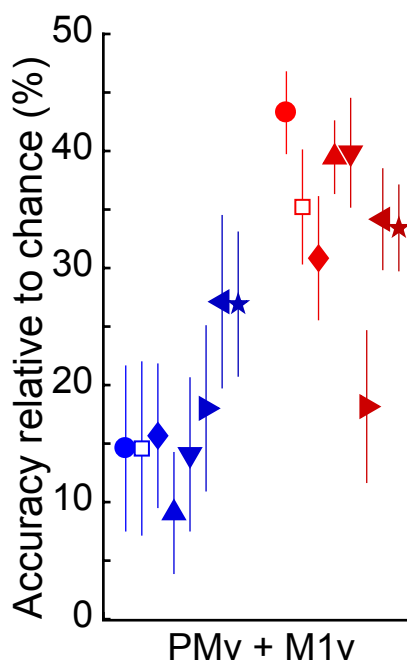**C**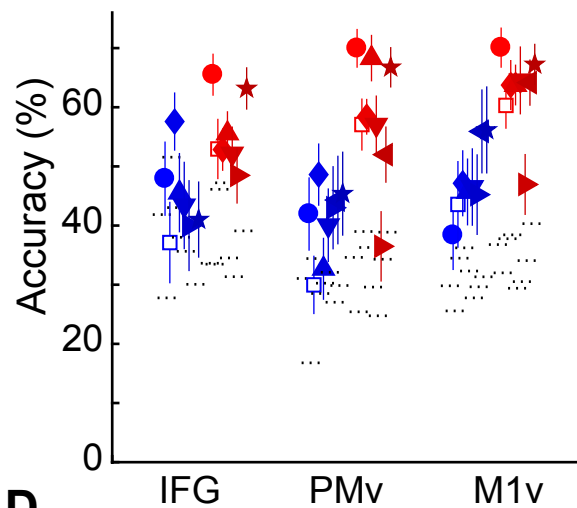**D**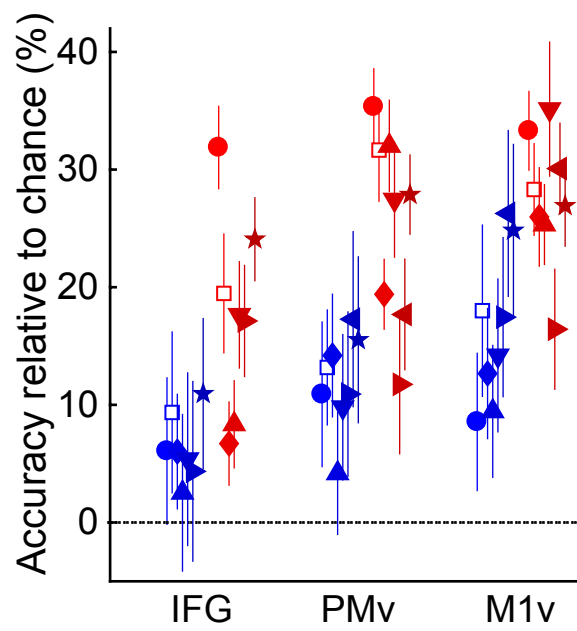

Supplement: Supplementary file [file 220723-1.pdf]
